# Supplementary material
Source: MDPI journal article supplement (https://www.mdpi.com/2073-4344/12/5/565)
Supplement: s1 [file s1]

# The Role of Nickel and Brønsted Sites on Ethylene Oligomerization with Ni-H-Beta Catalysts

Gabriel V. S. Seufitelli<sup>a</sup>, Jason J. W. Park<sup>a</sup>, Phuong N. Tran<sup>a</sup>, Anthony Dichiara<sup>a</sup>, Fernando L. P.

Resende<sup>b</sup>, Richard Gustafson<sup>a</sup>

<sup>a</sup> University of Washington, School of Environmental and Forest Sciences, Seattle, WA  
98195

<sup>b</sup> University of Texas at Tyler, Jasper Department of Chemical Engineering, Tyler, TX  
75799

Table S1: Adjusted constants for the models presented in Table 1 (main manuscript).

| Model description                | Mechanism <sup>1</sup> | Parameters                 |                            |
|----------------------------------|------------------------|----------------------------|----------------------------|
|                                  |                        | 198K                       | 258K                       |
| Dissociation over one site       | A                      | K=0.50 kPa <sup>-1</sup>   | K=0.19 kPa <sup>-1</sup>   |
| Simple adsorption over one site  | B                      |                            |                            |
| Simple adsorption over two sites | -                      | K=0.74 kPa <sup>-1</sup>   | K=0.20 kPa <sup>-1</sup>   |
| Dissociation over two sites      | -                      | K=0.21 kPa <sup>-1</sup>   | K=0.01 kPa <sup>-1</sup>   |
| Association over one site        | C                      | K=0.46 kPa <sup>-2</sup>   | K=0.58 kPa <sup>-2</sup>   |
| Freundlich                       | -                      | c=0.31 kPa <sup>-1/a</sup> | c=2.60 kPa <sup>-1/a</sup> |
|                                  |                        | a=0.08                     | a=2.54                     |

<sup>1</sup> Mechanisms depicted in Figure 1.
